# Supplementary material
Source: PubMed Central journal article supplement (PMC6615690)
Supplement: supp_RA119.008399_144255_2_supp_332930_prml4s.pdf [file supp_RA119.008399_144255_2_supp_332930_prml4s.pdf]

A nitric oxide synthase-like protein from *Synechococcus* produces NO/NO<sub>3</sub><sup>-</sup> from L-arginine and NAPDH in a tetrahydrobiopterin- and Ca<sup>2+</sup>-dependent manner

**Angela L. Picciano<sup>1</sup> and Brian R. Crane<sup>1\*</sup>**

**S-2 Table S1:** Measurement of NO<sub>2</sub><sup>-</sup> + NO<sub>3</sub><sup>-</sup> in the presence of Fe-MGD

**S-3 Table S2:** Heme content of syNOS constructs

**S-4 Figure S1:** Alignment of syNOS to sequences of NOS proteins

**S-5 Figure S2:** Alignment of syNOS<sub>g</sub> to sequences of globin proteins

**S-6 Figure S3:** Michaelis Menten plots for Ca<sup>2+</sup> and L-arg

**S-7 Figure S4:** Uv-vis spectra of double heme mutant H422A/C539A

|          | nmol NO <sub>2</sub> <sup>-</sup> + NO <sub>3</sub> <sup>-</sup> |
|----------|------------------------------------------------------------------|
| syNOS    |                                                                  |
| + Fe-MGD | 1.0 ± 1.0                                                        |
| - Fe-MGD | 35 ± 4                                                           |
| NOC - 7  | 78 ± 2                                                           |

**Table S1:** NO<sub>2</sub><sup>-</sup> + NO<sub>3</sub><sup>-</sup> production from syNOS measured by the Griess assay, in the presence or absence of the spin-trap Fe-MGD.

|             | Hemin & $\delta$ -ala | $\delta$ -ala     |
|-------------|-----------------------|-------------------|
| syNOS       | $1.00 \pm 0.10$       | $0.77 \pm 0.10$   |
| C539A       | $0.72 \pm 0.07$       | $0.42 \pm 0.02$   |
| H422A       | $0.39 \pm 0.08$       | $0.20 \pm 0.03$   |
| H422A/C539A | $0.10 \pm 0.02$       | $0.036 \pm 0.009$ |

**Table S2:** Heme incorporation ( $\mu\text{M}$  heme per  $\mu\text{M}$  protein) of syNOS constructs expressed in the presence of excess hemin and  $\delta$ -ala, or just  $\delta$ -ala.

20 40 60 80 100  
 syNOS 1 :MLVNDSRFTVEAHVLSVVRLVELCASGIPSNNEFKYKANVRVTCGTEQSNLQMLTRLQPSWLVLDIAHPSNCLFTVTFLFYRQGLGQFWHEAGSIKVTTA  
 eNOS - :-----  
 nNOS - :-----  
 iNOS - :-----  
 otNOS - :-----  
 bsNOS - :-----

120 140 160 180 200  
 syNOS 101 :DLFDKQRSVEISRFPVATWFAAPELMLNARFTCSDHTSQSGEAVLSLAGTRANASRRPTSLALVSDSIELPEAIPLTYSEAVIVKDVWNKLRWAKELQM  
 eNOS - :-----  
 nNOS 1 :MEENTFGVQCIQPNVISVRLFKRVGGLFVKVERVKPPVIIISDLIRGGAAEQSGLIQAGDIIILAVNDRFLVDLSYDALEVLRLGIASETHVVLILIRGP  
 iNOS - :-----  
 otNOS - :-----  
 bsNOS - :-----

220 240 260 280 300  
 syNOS 201 :ETFFKRLLEVPEDLYIFGEAFESIPDYFFEMFDCCVRELCPTENVVPEPMMGVPPERKGFADFTVADYGALFADIGMQPQHWRARQVMMWMLPQIPYL  
 eNOS 1 :-----MGNLKSVAQEP-----GPPCGGLGLGLGLGCGKQ-----  
 nNOS 101 :EGFTTHLETTFTGDTGPKTIRVTQPLGPPTKAVDLHSHQPSASKDQSLAVDRVTGLGNGPCHAGHGQAGSVSQANGVAIDPTMKSTRANLQDIGEHDDEL  
 iNOS 1 :-----MACPWKFLFKTKFHQYAMNG-----EKDINNVEKAPCATS-----  
 otNOS - :-----  
 bsNOS - :-----

Globin Domain

320 340 360 380 400  
 syNOS 301 :EEYDREDLAKGNKSALCKFFNTHVIGGMVAARDRYDLSALPPALVQKMDASWQYFAPRKNEMGVVEFYQTLFERYPQVLPVIFGRADMVLYSTHLFQSLFPIF  
 eNOS 30 :-----GPATPAPEPS-----RAPASLL-----PPAP-  
 nNOS 201 :LKEIEPVLISILNSGSKATNRGGPAKAEKMDTGIQVDRDLGKSHKAPPLGGDNDRVFNLDLWGDNDVPVILN-----NPFYSE  
 iNOS 37 :-----SPVTQDDLQYHN-----LSKQNE-----SFQPL  
 otNOS - :-----  
 bsNOS - :-----

N-Terminal Hook

420 440 460 480 500  
 syNOS 401 :LCLAEGETERLMKELRHLGRLHGNAGVPSFAYGAISEVMISMFKEYVPGFDEQLKEAWCVLIARVSNVIKPKLNEERLIKRERYTIVIAN-EQAWSES  
 eNOS 51 :--EHSPPSSPLTQPPG----PKFPRVKNWEVGSITYDTLSAQACQDGPCTPRRCGLSLVFPKLCGRSPGPPAPEQLISCARDFNQYSSIKRSGSQ  
 nNOS 277 :LKEQSPKSGKSPFKNGSPSRCPFLKVKNNWETDVVLTDDYHLKSTLETGCTEHCIMGSIPLPSQHTRKE-DVTRTKDQFPLAKEPFDQYSSIKRFGSK  
 iNOS 61 :VETGKKSPELVKLDATPLSSPRHVIRKNWGSMTFQDILHKKAGILTCRSKSLGSIPTPKSLTRGPRDKPTPPDELPOPIEFVFNQYSGSFKEAKIE  
 otNOS 1 :-----MASVGSATDDDGVDVPSRCPFAHGTVAIDPYPGYVHGKPRVCP-----RGCVPFPSPKPTESAESALRREAEEYIRLQKHEGWDDDE  
 bsNOS 1 :-----GSHMETIWNREKAFIAECQELGK--EE

α

β

520 540 560 580 600  
 syNOS 500 :DRERWQELKAEVQATTTTHTYBELAYGQCLAWRNWSPFCIRIOWSNVYVFRFHVTDDEDMQELPEHILRLGTNGCNIQIVMTVFRPKPKERWGP  
 eNOS 145 :AHECRLOEVEAEVAATSTYQLRESELVGGARCAWRNAPRCVGRICWGRLOVEFARDCRCAQEMTYICNHHKYATKGNLRSATITVFPQRC-PGRGDFRI  
 nNOS 376 :AHMRLDEEVNKEEESASTYQLKDDLELYGARHAWRNARCVGRICWGRLOVEFARDCTAHGCMNYICNHHKYATKGNLRSATITVFPQRC-PGRGDFRI  
 iNOS 161 :EHLARVEAVTKETHTTGTQLTGELEIATKCAWRNAPRCIRIOWSNLOVEFARSCSAREMEHEICRHVRYSTINGNIRSATITVFPQRS-DGKHDFRV  
 otNOS 86 :RVEMRVNEVLTSRETTGTAHTLDEIRGARVAWRNAPKCNKRYWSTLVIDARGATNEDMEAKKEHLHRGVEADVPLVMTVFRPOTPGTNDGPI  
 bsNOS 27 :EVKRLDLSIKSEIDRTGSVHTKBELEHGARMWRNSNRCIRIOWSNVYVFRFHVTKEDVRDAEFHETATNGNIRSATITVFPQRC-PGRGDFRI

Oxygenase Domain

620 640 660 680 700  
 syNOS 600 :WNEQLIRYAAWEMFDGSIINGDPAANETTHQIIEKMWQEPPEPSSYDILPLVLEVPVPRHE-FRLYSFAPEEILEVEHEHETIPDKTLELRWYVPAISNF  
 eNOS 244 :WNSQLVRYAGYRQDQSGVGRDEANVEIHELICIQHG-WTEGNCR--FDLPLLLCAPDEP-PELELLEPELVLEVEHEHETLEWAMGLRWYALPAVSNM  
 nNOS 475 :WNSQLIRYACYKQDQSGVGRDEANVEIHELICIQHG-WKAPGR--FDLPLLLCANGND-PELELLEPELVLEVEHEHETLEWAMGLRWYALPAVSNM  
 iNOS 260 :WNAQLIRYACYQMDQSGVGRDEANVEIHELICIDLG-WKPKYGR--FDVPLVLCANGRD-PELELLEPELVLEVEHEHETLEWAMGLRWYALPAVSNM  
 otNOS 186 :WNSQLMRYAHRDASGGVVDPAEIDFDVLLKHFQWAEKTKG-MFDLPLVVCINPTEPAMFLEDCFLVEHEHETIRGISQLKWKYCIAPVSNM  
 bsNOS 126 :WNEQLIRYAGYE-SGDERIGDPAASRLTAACEQLG-WRGETRD--FDLPLDFRMRGDECVWVLELRSVLEVEHEHETLEWAMGLRWYALPAVSNM

720 740 760 780 800  
 syNOS 699 :RNIIGGVVYACLPFNQWYMGTEIAR-DELEGGRYGMKAIENLGLNLSSEQLWRDRVALEMNNAVHSHFQKARVTMDDHOSACCELAHDLRFKFRAGR  
 eNOS 340 :LEIIGGLEFFPAAPPSGWYMGTEIAR-DELEGGRYGMKAIENLGLNLSSEQLWRDRVALEMNNAVHSHFQKARVTMDDHOSACCELAHDLRFKFRAGR  
 nNOS 571 :LEIIGGLEFFSACPPSGWYMGTEIAR-DELEGGRYGMKAIENLGLNLSSEQLWRDRVALEMNNAVHSHFQKARVTMDDHOSACCELAHDLRFKFRAGR  
 iNOS 356 :LEIIGGLEFFPGPPNPGWYMGTEIAR-DELEGGRYGMKAIENLGLNLSSEQLWRDRVALEMNNAVHSHFQKARVTMDDHOSACCELAHDLRFKFRAGR  
 otNOS 285 :INDLGGLEHTAAPPNPGWYMGTEIAR-DELEGGRYGMKAIENLGLNLSSEQLWRDRVALEMNNAVHSHFQKARVTMDDHOSACCELAHDLRFKFRAGR  
 bsNOS 222 :RNEVGGLEHTAAPPNPGWYMGTEIAR-DELEGGRYGMKAIENLGLNLSSEQLWRDRVALEMNNAVHSHFQKARVTMDDHOSACCELAHDLRFKFRAGR

γ

β

Calmodulin Binding

820 840 860 880 900  
 syNOS 798 :ECPADYGVVVPAGGACFVWE--HQRDEYLQFAHHAADRWAVEADIDLEQVQTT-----HESDHQRDRILIDGSETCTAGG  
 eNOS 440 :GCPADWVIVVPPISGILTEVFE--CEVNNVFLSPARYPDPKGSAAKGTGITRKKT----FKEVANAVKISASLMGTVMMAKRVKATILYGETCRAGS  
 nNOS 671 :GCPADWVIVVPPISGILTEVFE--CEVNNVFLSPARYPDPKGSAAKGTGITRKKT----FKEVANAVKISASLMGTVMMAKRVKATILYGETCRAGS  
 iNOS 456 :GCPADWVIVVPPISGILTEVFE--CEVNNVFLSPARYPDPKGSAAKGTGITRKKT----FKEVANAVKISASLMGTVMMAKRVKATILYGETCRAGS  
 otNOS 385 :YALGNWVIVVPPISGILTEVFE--CEVNNVFLSPARYPDPKGSAAKGTGITRKKT----FKEVANAVKISASLMGTVMMAKRVKATILYGETCRAGS  
 bsNOS 322 :KLTCDWVIVVPPISGILTEVFE--RSDYLSIKRNFYQDKFEE-----AFSTVSIRVAIAAAKFRNKLVKGGVLYLVAADGCRSS

ββ

β

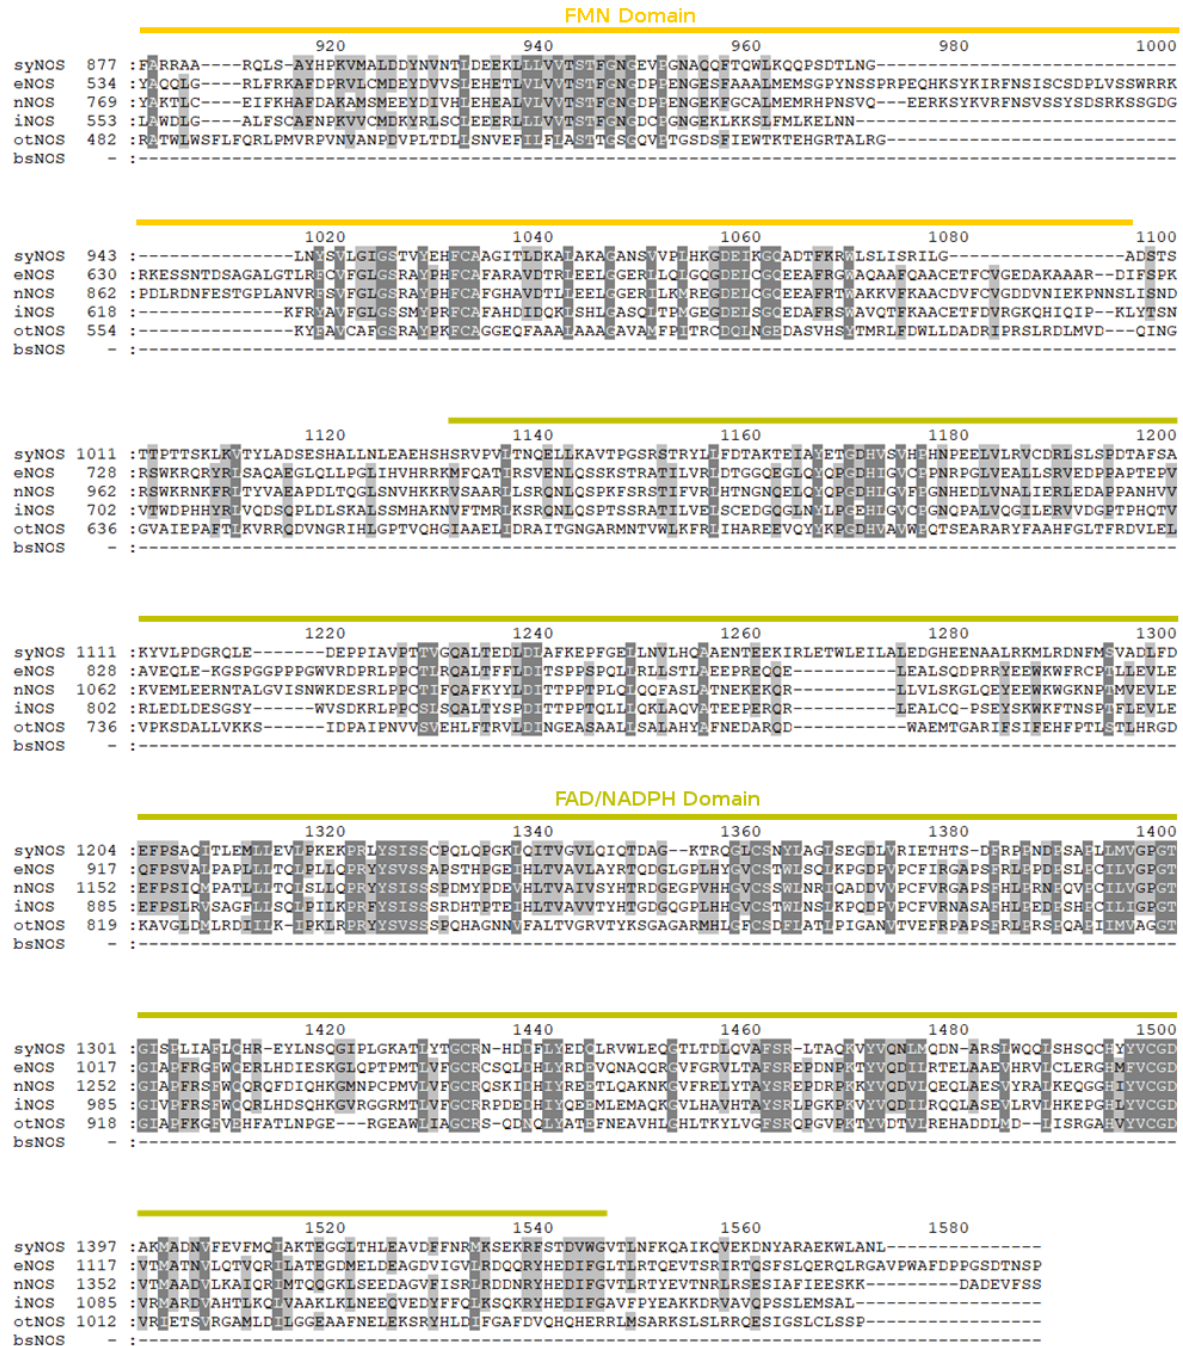

**Figure S1:** Protein sequence alignment of syNOS to other NOS proteins. The alignment was performed using ClustalX2 and visualized with GeneDoc; proximal heme binding residues ( $\alpha$ ), pterin binding residues ( $\beta$ ), arginine coordinating glutamate ( $\gamma$ ), *Homo sapien* endothelial NOS (eNOS), *Rattus norvegicus* neuronal NOS (nNOS), *Homo sapien* inducible NOS (iNOS), *Ostreococcus tauri* NOS (otNOS), *Bacillus subtilis* (bsNOS).

|            |     |                                       |            |       |                  |             |            |                |
|------------|-----|---------------------------------------|------------|-------|------------------|-------------|------------|----------------|
|            |     | 340                                   |            | 360   |                  | 380         |            | 400            |
| syNOS      | 325 | :IGGMVAARDRYDSATPPALVQKMAISWQYFAPRKNE | NGVEFYQTL  | ERYE  | CVL              | IFGRADMDYLS | THLFQSLEFI | FLCLAE         |
| S._cerevis | 1   | :-----MIAEKTRSLIKATVPVIEQOGTV         | TRTFYKNNL  | TEHTE | LLNFNRTNQKVGAC   | PNA         | ATTVLA     | AAKNI          |
| V._stercor | 1   | :-----MLDQQTINIKATVPVIEKEHGV          | TTTTFYKNNL | AKH   | PEVRELEDMGRQESLE | CPKA        | AMTVL      | AAAQNI         |
| E._coli    | 1   | :-----MLDAQTIAIVKATIPLEIVETGPR        | TAHFYDRM   | ETHN  | PEIKELFNMSNQRNGD | CREA        | FNA        | AAAYASNI       |
| M._inferno | 1   | :-----IDQKEKELIRBSWKRTEPNKNE          | GLLFYANL   | KEE   | TVSVLFQN         | ---         | PISS       | SRKMQVIGILVGGI |

  

|            |     |         |            |                       |            |         |          |                   |             |
|------------|-----|---------|------------|-----------------------|------------|---------|----------|-------------------|-------------|
|            |     | 420     |            | 440                   |            | 460     |          | 480               |             |
| syNOS      | 406 | :GSTERL | NKEERH     | GRIGHNAGVPSFAYGATSEVM | ISMFEKYV   | -PGFDE  | QIKBAW   | CVLIARVSNVIKLPKLN | NEERLLKKARE |
| S._cerevis | 69  | :DDISV  | LDHVKCHGHK | HRALCKKPEHYPIVGEV     | LLKATKEVI  | GDAATPE | IINAWGEA | IQ                | -----       |
| V._stercor | 69  | :ENIPAL | IPAWKKA    | VKHCQAGVAAAHYPIVGE    | ELLGATKEVI | GDAATD  | LLD      | AWGKANG           | -----       |
| E._coli    | 69  | :ENIPAL | IPAWKKA    | VKHCQAGVAAAHYPIVGE    | ELLGATD    | MFSPGQ  | -EYLL    | AWGKANG           | -----       |
| M._inferno | 65  | :DNEGL  | IPPTQD     | GRNPKQYGVVDSHYPLV     | EDLLKSHQ   | EYLGQGF | TEAKP    | AWTKV             | IG          |

$\alpha$

**Figure S2:** Protein sequence alignment of syNOS<sub>g</sub> to other globins and flavohemoglobins of known structures (*Saccharomyces cerevisiae* 4G1V, *Vitreoscilla stercoraria* 1VHB, *Escherichia coli* 1GVH, *Methylokorus infernorum* 3UBC). The alignment was performed using ClustalX2 and visualized with GeneDoc; proximal heme binding residue ( $\alpha$ ).

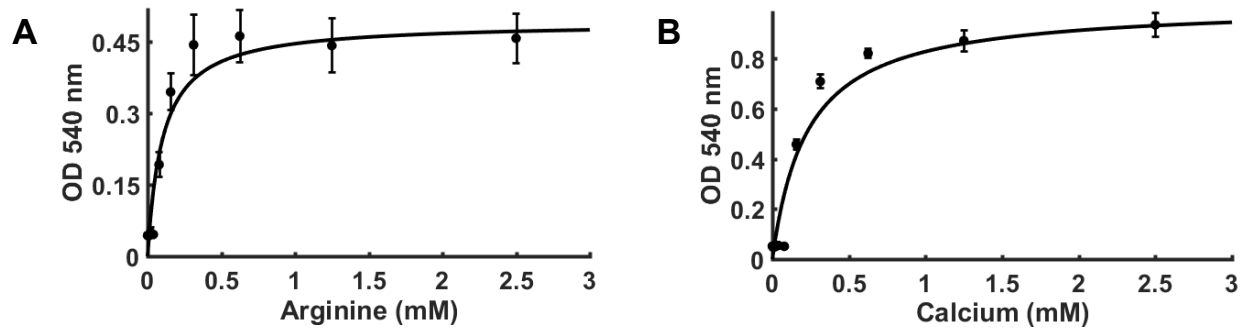

**Figure S3:** Michaelis-Menten plots for syNOS activity as a function of L-arg concentration (A) and calcium concentration (B).  $K_M$  values for arginine and calcium were calculated to be  $101 \pm 12 \mu\text{M}$  and  $228 \pm 9 \mu\text{M}$ , respectively.

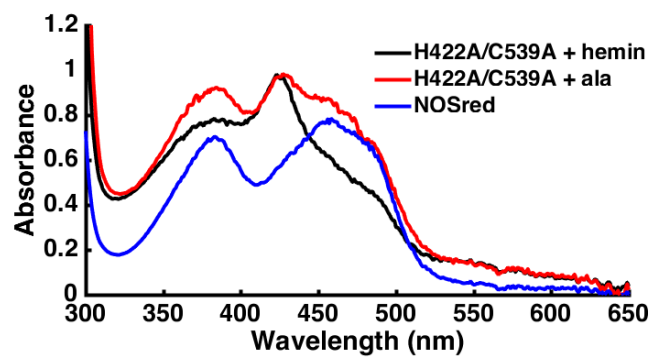

**Figure S4:** UV-vis spectra of the heme double mutant H422A/C539A compared to the syNOS reductase domain reveals minimal heme is bound when the proximal heme ligands are mutated.
